# Supplementary material for: Investigation of the Mode of Action Underlying the Tumorigenic Response Induced in B6C3F1 Mice Exposed Orally to Hexavalent Chromium
Source: PubMed Central journal article supplement — Toxicol Sci. 2011 Jun 28;123(1):58–70. doi: 10.1093/toxsci/kfr164 (PMC3164443; doi:10.1093/toxsci/kfr164), 2011-06-28
Supplement: supp_kfr164_0354_Supplemental_Material.pdf [file supp_kfr164_0354_Supplemental_Material.pdf]

## Supplemental Materials

**Table S1. Cytokines and Chemokines Analyzed.**

| <b>Name</b>                                                            | <b>Abbreviation</b>                           |
|------------------------------------------------------------------------|-----------------------------------------------|
| Granulocyte-colony stimulating factor                                  | G-CSF                                         |
| Granulocyte/macrophage-colony stimulating factor                       | GM-CSF                                        |
| Interferon-gamma                                                       | IFN- $\gamma$                                 |
| Interleukin-1-alpha                                                    | IL-1 $\alpha$                                 |
| Interleukin-1-beta                                                     | IL-1 $\beta$                                  |
| Interleukins 2, 4, 5, 6, 7, 9, and 10                                  | IL-2, IL-4, IL-5, IL-6, IL-7, IL-9, and IL-10 |
| Interleukin 12 p70 subunit                                             | IL-12 (p70)                                   |
| Interleukins 13, 15, and 17                                            | IL-13, IL-15, IL-17                           |
| Chemokine (C-X-C motif) ligand 10 or IFN- $\gamma$ -induced protein 10 | CXCL10 or IP-10                               |
| chemokine (C-X-C motif) ligand 1                                       | CXCL1, GRO $\alpha$ , or KC                   |
| monocyte chemotactic protein-1                                         | MCP-1                                         |
| macrophage inflammatory protein-1-alpha                                | MIP-1 $\alpha$                                |
| chemokine (C-C motif) ligand 5                                         | CCL5 or RANTES                                |
| Tumor necrosis factor-alpha                                            | TNF- $\alpha$                                 |

**Table S2. Summary of Bodyweight, Water Consumption, and Ingested Dose**

| Dose | Bodyweight (g) |                   | Water Intake                   | Average Daily Ingested Dose |                                |
|------|----------------|-------------------|--------------------------------|-----------------------------|--------------------------------|
|      | Week 1         | Week 13           | (mL/day)<br>13-Week<br>Average | SDD                         | (mg/kg) <sup>a</sup><br>Cr(VI) |
| 0    | 18.5           | 25.8              | 5.2                            | 0                           | 0 <sup>b</sup>                 |
| 0.3  | 18.7           | 26.4              | 5.3                            | 0.07                        | 0.024                          |
| 4    | 19.1           | 25.9              | 5.3                            | 0.92                        | 0.32                           |
| 14   | 18.7           | 26.3              | 5.1                            | 3.1                         | 1.1                            |
| 60   | 18.8           | 25.3              | 5.0                            | 13.2 (9) <sup>f</sup>       | 4.6                            |
| 170  | 18.6           | 24.9              | 4.3 <sup>d</sup>               | 33.0                        | 11.6                           |
| 520  | 18.6           | 23.3 <sup>c</sup> | 3.7 <sup>e</sup>               | 88.7 (45) <sup>g</sup>      | 31.1                           |

<sup>a</sup>calculated using average weekly body weight and water consumption data, and percent mass of Cr(VI) in SDD.

<sup>b</sup>total chromium concentration in tap water was 0.098 µg/L (9.8 x 10<sup>-5</sup> mg/L)

<sup>c</sup>bodyweight was significantly lower than control group on weeks 2 and 4-13 by ANOVA followed by Dunnett's test

<sup>d</sup>water intake was significantly lower than control group on weeks 5, 7, 8, 10 and 11 by ANOVA followed by Dunnett's test

<sup>e</sup>water intake was significantly lower than control group on weeks 1, 3, 5-7, and 9-13 by ANOVA followed by Dunnett's test

<sup>f</sup>parentheses indicate reported average daily doses at 62.6 mg/L SDD drinking water concentrations in NTP (2007)

<sup>g</sup>parentheses indicate reported average daily doses at 500 mg/L SDD drinking water concentrations in NTP (2007)

**Table S3. Summary of Serum Iron, Transport and Storage Proteins<sup>a</sup>**

| mg/L SDD | Serum Iron<br>( $\mu\text{g/dL}$ ) | Transferrin<br>(mg/mL) | Ferritin<br>(ng/mL)             |
|----------|------------------------------------|------------------------|---------------------------------|
| 0        | 167.2 $\pm$ 22.0                   | 3.668 $\pm$ 0.129      | 393.60 $\pm$ 58.62              |
| 0.3      | 194.6 $\pm$ 25.6                   | 3.640 $\pm$ 0.323      | 394.20 $\pm$ 50.89              |
| 4        | 217.2 $\pm$ 19.9                   | 3.712 $\pm$ 0.281      | 350.00 $\pm$ 69.13              |
| 14       | 212 $\pm$ 50.6                     | 3.524 $\pm$ 0.170      | 328.25 $\pm$ 67.62 <sup>b</sup> |
| 60       | 190 $\pm$ 23.2                     | 3.604 $\pm$ 0.093      | 263.20 $\pm$ 37.00              |
| 170      | 213.2 $\pm$ 40.2                   | 3.542 $\pm$ 0.204      | 351.80 $\pm$ 136.49             |
| 520      | 117.6 $\pm$ 17.7                   | 3.776 $\pm$ 0.765      | 317.00 $\pm$ 76.95              |

<sup>a</sup>data are mean  $\pm$  s.d.; n=5 except where noted

<sup>b</sup>n=4

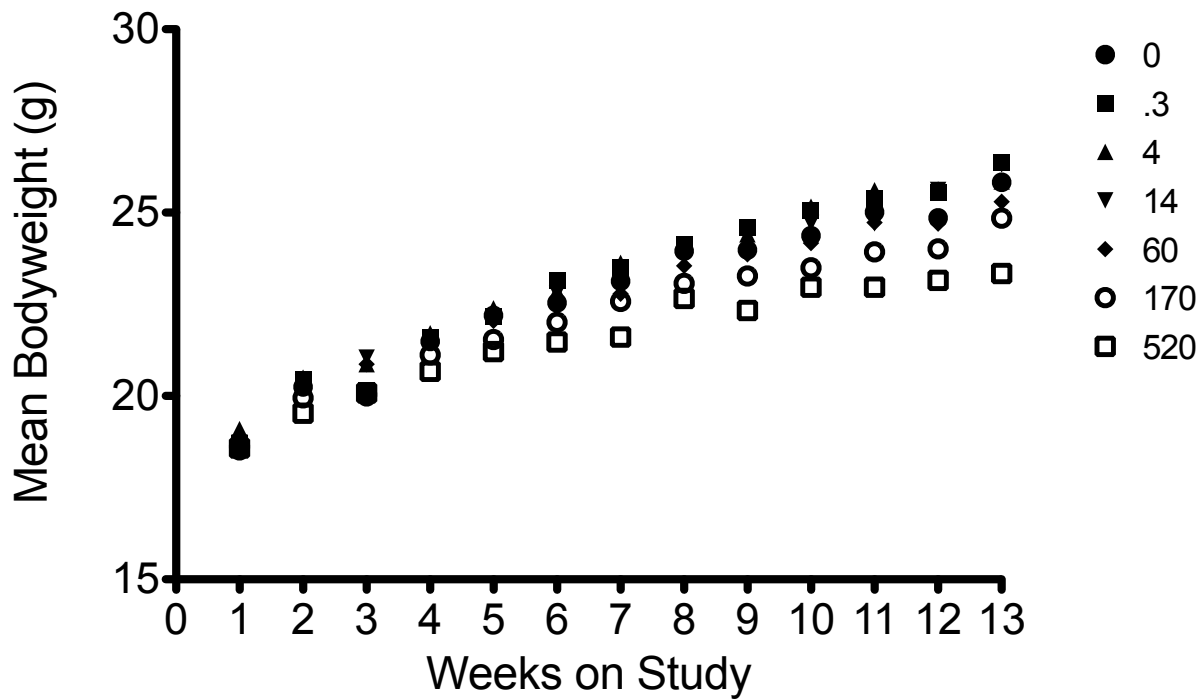

**Figure S1.** Weekly mean bodyweight for each dose group.

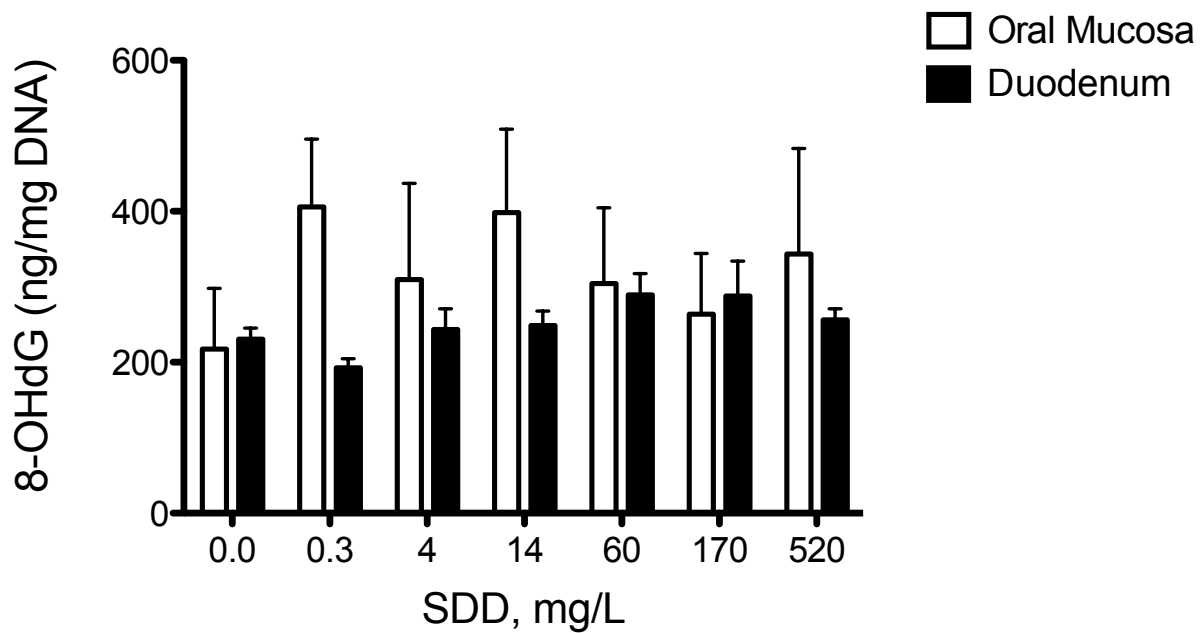

**Figure S2.** Measures of oxidized DNA in oral and duodenal epithelia after 90 days of exposure to SDD. Data plotted are mean and SEM (n = 8-10 animals).

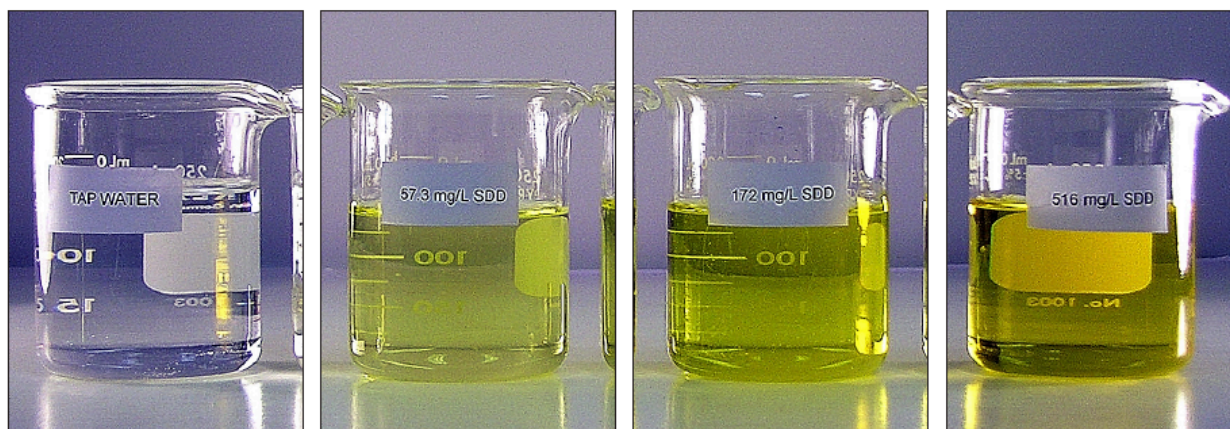

**Figure S3.** Color of tap water, 60, 170, and 520 mg/L SDD (left-to-right).
